# Supplementary material
Source: Springer Nature journal article supplement (https://www.springermedizin.de/resource/supplementary/12913_2013_2675_MOESM10_ESM.pdf/9531116)

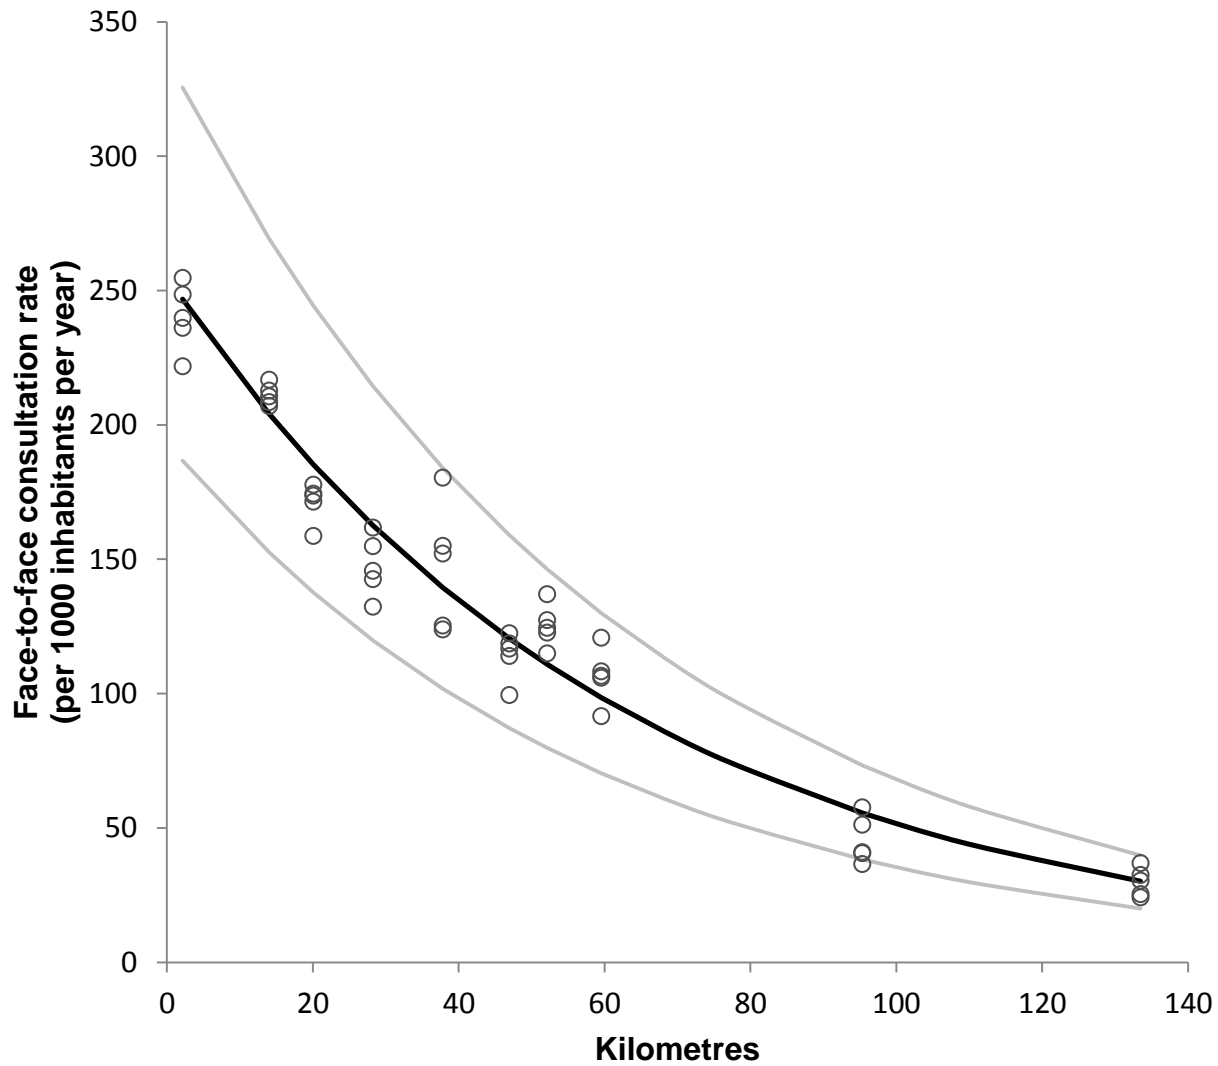

Supplement: MOESM10 [file 9531116]
